# Supplementary material
Source: Springer Nature journal article supplement (http://www.springermedizin.de/resource/supplementary/12891_2013_1838_MOESM2_ESM.pdf/9508590)

**A**

10

50

100

200

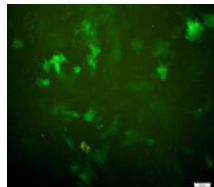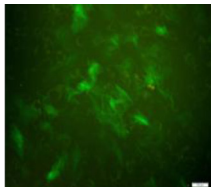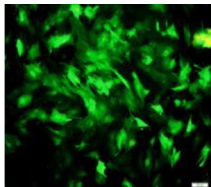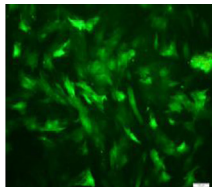**B**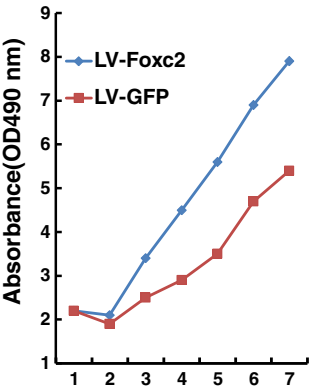**C**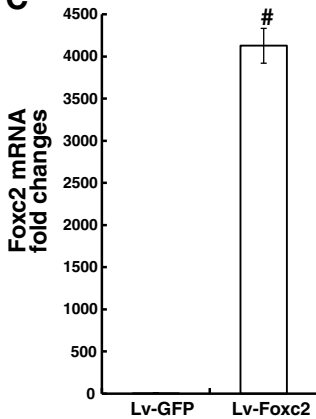**D**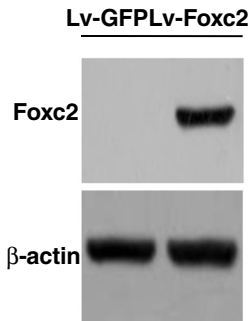

Supplement: MOESM2 [file 9508590]
